# Supplementary material for: Mutant IDH1 Disrupts the Mouse Subventricular Zone and Alters Brain Tumor Progression
Source: Oxford University Press journal article supplement (doi:10.1158/1541-7786.mcr-16-0485), 2017-02-01
Supplement: 15417786mcr160485-sup-176550_1_supp_3821514_5j5bpm.xlsx [file 15417786mcr160485-sup-176550_1_supp_3821514_5j5bpm.xlsx]

## Sheet: Sheet1
Supplementary Table S2:
Affymetrix GeneChip Mouse Gene 2.0 ST Array was used for gene expression profiling and Affymetrix Expression Console was used for data processing and normalization
Gene list displays those genes with more than a 2-fold change when comparing IDH1LSL:R132H/WT ad-GFP transduced NSCs with IDH1LSL:R132H/WT ad-Cre transduced NSCs
Gene	Fold change
Pla2g7	-21.204
Luzp2	-12.2255
Tnr	-10.1236
Brinp3	-8.81551
Cdo1	-7.41396
Gpr17	-7.20619
1110015O18Rik	-7.1289
E330013P04Rik	6.85146
Erbb4	-6.61907
Pdgfra	-6.60027
Has2	-6.40632
B3gnt5	-6.38507
Slc1a1	-6.3749
Otx2	-6.13775
Serpina3n	5.62462
Neat1	5.52143
Slitrk3	-5.27873
Casd1	-4.30812
Snap25	-4.29316
Churc1	-4.26865
Acta2	-4.22543
B230323A14Rik	-4.22507
Zfhx4	-4.17519
St6gal2	-4.16767
Gm13251	4.12561
Cacna2d3	4.12283
Gprasp2	-4.10453
Slc30a10	-4.08636
Neat1	4.01159
Timp3	-4.00636
Dll3	-4.00574
Pcdh15	-4.0052
Pcp4l1	-3.99937
Rab33a	-3.94553
Gstt1	-3.93483
Vit	-3.83745
Slc2a12	-3.77695
Rtn4rl1	3.69378
Jmjd8	-3.6307
Gjc3	-3.61319
Gm13248	3.61197
Cyp4f15	-3.55951
Mmp16	-3.54995
Cntn1	-3.50741
Cap2	-3.50264
Ccnb2	-3.46144
Shd	-3.45962
Bex1	-3.45302
Nynrin	-3.44854
Ptgr2	-3.4316
Spock2	-3.42079
Grin2a	3.40331
Dscaml1	-3.34154
9330188P03Rik	-3.32833
Dcx	-3.2813
Cdk6	3.27807
Pcdh17	-3.26865
Pstpip2	-3.26234
Adamts12	3.25857
Atp1a2	-3.24363
Pbk	-3.2424
Ndrg2	-3.20921
4922502B01Rik	-3.2055
Angpt2	3.18808
Nupr1	3.187
Znf41-ps	3.18567
Cyp7b1	-3.17315
Spry3	-3.17289
Parvb	-3.16106
Adamts3	-3.1522
Adamtsl3	3.15108
Aldh1l1	-3.15019
4833424O15Rik	-3.14146
Tgfb1i1	-3.14075
Nptx1	3.13474
Gpr149	-3.13233
Grik3	-3.10978
Plxdc2	-3.10686
Tmem196	-3.08494
Neat1	3.08078
Omg	-3.07967
Adcy2	3.07328
Osr2	3.05839
Anxa6	-3.05062
Taf9b	-3.04483
Dmrta1	-3.03301
9430041J12Rik	-3.02382
Dscam	-3.01434
Kctd12	3.01034
Mfsd2a	-3.00876
Pdpn	-2.98736
Syt9	2.96997
Rnf180	-2.95221
Nnat	-2.94947
Fn1	2.92132
BC068157	-2.90412
Sparcl1	2.8965
Camk1d	2.8834
Car3	-2.88316
Prelp	2.88159
Ska3	-2.85385
Cnpy1	-2.85236
Nrarp	-2.85159
Actc1	-2.84977
Abracl	-2.84566
Ankrd34c	2.8418
Dera	-2.82974
Dlgap1	-2.81469
Gpr37l1	-2.80999
Tmem255b	-2.80868
Wbscr17	2.80279
Capn5	-2.79334
Anks1b	-2.78231
Cdc42ep3	2.76982
Npnt	2.76916
Bcas1	-2.7668
Lef1	2.76446
Ugt8a	-2.76334
Fras1	2.75367
Hspb8	2.74176
Mt2	-2.73846
AA792892	2.7384
AA792892	2.7384
Nalcn	-2.73756
Cd80	2.73678
Ctnna2	-2.73517
Lims2	-2.73403
Plekha2	-2.73102
Tmem100	-2.72602
Sned1	2.70458
Lactb2	-2.69262
Mical1	-2.68386
3110035E14Rik	-2.66215
Efna3	2.66031
Gm19335	-2.65908
Six3os1	-2.65224
Chl1	-2.63801
E130309F12Rik	-2.63107
Aspa	-2.62713
Kit	-2.62142
Arvcf	-2.6143
Gm5593	-2.61311
Snca	-2.60948
Neil3	-2.60774
Vcam1	-2.60139
Hist2h2ab	-2.59237
Thy1	-2.5778
Gjd2	-2.57132
Esco2	-2.56995
Enpp2	-2.56103
Mmp14	-2.55756
Klf4	2.54804
Sox2ot	-2.54666
Gm13238	2.54396
Leprel1	2.53222
2610100L16Rik	-2.53097
Serpinb5	2.52919
Mical2	2.52847
Shcbp1	-2.52551
Igfbp7	2.52399
Reln	2.51764
Lpar4	-2.51654
Pdp1	2.51554
Htr3a	2.50996
Pdk4	-2.505
Apoe	-2.50475
Plxnd1	2.49836
Fosl2	2.49247
Stx3	-2.48427
9430020K01Rik	2.48013
Prom1	-2.47775
Opalin	2.47558
Gpr165	-2.4662
Abracl	-2.46519
Lacc1	-2.4532
Rps6ka6	-2.45148
AA792892	2.44671
Atf3	2.44282
Anxa2	2.44171
Cdc25c	-2.43916
Eif2s3y	-2.43807
C87414	2.43664
Prkcq	-2.43353
Aqp4	-2.42439
Gbp2	2.41843
Pak3	-2.41459
Rap1gap	-2.41321
Adamts5	-2.41227
Itga5	2.41022
Kcnj10	-2.40731
Snora44	2.40605
Cdkn3	-2.40295
Tgfb3	2.39691
Gnao1	2.39484
Zc3hav1	-2.38936
Smarca1	-2.38926
Cbs	-2.38499
Cxxc4	-2.38335
Bub1	-2.36373
P2rx7	-2.36063
Gm22270	2.36031
Lgi3	-2.35815
Irx1	-2.35551
Ddt	-2.35512
Stag3	2.35014
Gria3	-2.34946
Cdca2	-2.34083
Abcg4	-2.33544
Cd59a	2.33501
Sfrp2	-2.33104
Dgkg	2.32189
Apln	2.31962
Snora33	2.31608
Hist1h2ab	-2.31373
Cd109	2.31307
Depdc1a	-2.30709
Ttyh1	-2.30201
Lypd1	-2.30014
Mtmr11	-2.29836
Gm19825	-2.29824
Ncapg	-2.29582
Ceacam1	2.29414
Arhgap29	2.29338
Lnx1	-2.29096
Cybrd1	-2.28942
Adamts1	2.28708
Slitrk5	-2.2868
Socs2	2.28246
Mis18bp1	-2.27869
Gnpda1	-2.27836
Ppp1r16b	-2.27398
Gria2	-2.27048
Ripply1	2.26612
A530058N18Rik	-2.26563
Lrrtm3	-2.26351
Cacna2d1	2.26081
Ecm2	2.25988
Kcnk2	-2.24564
Zfp711	-2.24215
Bora	-2.23546
Cd97	-2.23507
2610307P16Rik	-2.2317
Clstn2	2.22912
Tiam2	-2.22812
Dll4	2.22696
Id1	2.22571
Hist1h4m // Hist1h4b // Hist1h4a // Hist4h4 // Hist1h4n // Hist1h4k // Hist1h4j // Hist1h4i // Hist1h4f // Hist1h4d // Hist1h4c // Hist2h4 // Hist1h4h	2.22323
Mab21l2	-2.21803
Shisa9	-2.21734
Gm19351	-2.2173
Rnase1	2.21659
n-R5s204	-2.21259
n-R5s204	-2.21259
Csdc2	2.21057
Igsf10	-2.20909
Gm26205	2.20907
2900011O08Rik	-2.20852
Gm22645	-2.20831
Slc8a2	-2.2062
Slc6a11	-2.20568
Cep170b	2.20523
Ttk	-2.19622
Tmem223	-2.19214
Cd93	-2.19207
Adhfe1	-2.18793
Bex4	-2.18655
Gadd45b	2.18571
Cmtm5	-2.18093
Pcdh9	-2.17817
Kitl	2.17667
Stk32a	-2.16957
Kank4	2.16887
Gabra2	2.16776
C230004F18Rik	-2.16651
Cdr1	-2.16585
C87414	2.16485
Hmcn1	2.16386
Aurkb	-2.16295
Sik1	2.16042
1500009C09Rik	-2.15904
Nuf2	-2.15832
Adm	2.1575
Cep55	-2.15363
Axl	-2.15208
9030617O03Rik	2.1488
Adora2b	-2.1486
Anxa3	-2.14664
Ppp2r2c	2.14656
Olfr1310	2.14429
Arhgef3	-2.1421
Reps2	2.13634
Kif2c	-2.13437
Hook1	-2.1329
Gca	-2.13272
Olfr1316	2.13156
Nxph1	-2.1285
Mfap2	-2.12841
Rny1	2.12837
Melk	-2.12796
H60b	-2.12724
Tyw5	-2.12715
Crlf1	2.12432
Ifi27	2.1239
Nt5dc3	2.12381
Kif11	-2.12322
Gpx3	-2.12186
Rbms1	2.1192
Rgs4	2.11898
Cenpk	-2.11789
Ppp1r13b	2.1168
Ccnb1	-2.11239
Enpp3	-2.1096
Dlgap5	-2.10775
Irf2bpl	2.10541
Pqlc3	2.10536
Stc1	2.10498
Aspm	-2.10049
Top2a	-2.09834
Igf2bp2	2.09744
Nap1l2	-2.09395
Neurl1a	2.09059
Asrgl1	-2.08953
Dleu7	-2.08897
Cenpe	-2.08872
Gpr179	2.08834
Hmmr	-2.088
Tm4sf1	2.08695
9230114K14Rik	2.08414
Eogt	-2.08327
Ect2	-2.08222
Casc5	-2.08177
Cnksr2	-2.07941
Tnfaip6	-2.0791
Ugdh	-2.07872
Edil3	-2.07713
Grm3	-2.07086
Irx2	-2.06691
Snora62	2.06378
Mchr1	2.06063
Chac1	2.05872
2610035D17Rik	-2.05645
Tnfsf18	2.05439
Mamdc2	-2.05328
Gsta4	-2.05061
Gm3693	2.05044
Ube2ql1	2.04977
Dhrs4	-2.04567
4933432K03Rik	2.04425
Gm23134	-2.04128
Kif4	-2.0409
Ndc80	-2.04035
2810417H13Rik	-2.04025
Cnn2	-2.03962
Gulp1	-2.03938
Gm23138	-2.03685
LOC102635912	-2.03635
Stmn3	-2.03524
3632451O06Rik	-2.03473
Hepacam	-2.03412
Man1c1	2.03366
Ctsc	-2.03008
Sema3c	2.02814
Tgif1	2.02533
Cxcr4	-2.0246
Tgfbr2	2.02447
Sox2ot	-2.02247
Ebf3	2.02223
Epb4.1l4b	2.02122
Bub1b	-2.02026
Chchd10	-2.01947
Btbd11	2.01783
Serpinb1a	2.01726
Ap3b2	-2.01715
Cdh11	-2.01709
Fam189a1	2.01313
Syce2	-2.012
Tmem173	2.01076
Plk1	-2.01075
Mapk8ip2	-2.00985
Fuca2	-2.00981
Gm13139	2.00945
Fndc3c1	-2.0093
Glipr2	2.00922
Dtx1	-2.00827
Eda	2.00732
Bscl2	-2.00282
Scg3	-2.00058
Ier5l	2.00019
