# Supplementary material for: Mutant IDH1 Disrupts the Mouse Subventricular Zone and Alters Brain Tumor Progression
Source: Oxford University Press journal article supplement (doi:10.1158/1541-7786.mcr-16-0485), 2017-02-01
Supplement: 15417786mcr160485-sup-176550_1_supp_3821520_bjbbpq.docx [file 15417786mcr160485-sup-176550_1_supp_3821520_bjbbpq.docx]

**Supplementary Materials and Methods**

**Gene Expression Profiling and Pathway Analysis**

The Affymetrix GeneChip Mouse Gene 2.0 ST Array was used for gene expression profiling, and Affymetrix Expression Console was used for data processing and normalization. Gene expression microaaray data has been submitted the Gene Expression Omnibus (GEO) database under accession GSE 88828. Hierarchical clustering was performed with the R package heatmap on the top 1% variant genes (n=414)(2,3). Genes with more than 2-fold change were selected for pathway analysis by DAVID (4,5).

References:

1. Struys EA, Jansen EE, Verhoeven NM, Jakobs C. Measurement of urinary D- and L-2-hydroxyglutarate enantiomers by stable-isotope-dilution liquid chromatography-tandem mass spectrometry after derivatization with diacetyl-L-tartaric anhydride. Clinical chemistry **2004**;50:1391-5 doi 10.1373/clinchem.2004.033399.

2. Kolde R. pheatmap: Pretty Heatmaps. R package version 0.7.3. **2012**.

3. Team RC. R: A language and environment for statistical computing 2012.

4. Huang da W, Sherman BT, Lempicki RA. Systematic and integrative analysis of large gene lists using DAVID bioinformatics resources. Nature protocols **2009**;4:44-57 doi 10.1038/nprot.2008.211.

5. Huang da W, Sherman BT, Lempicki RA. Bioinformatics enrichment tools: paths toward the comprehensive functional analysis of large gene lists. Nucleic acids research **2009**;37:1-13 doi 10.1093/nar/gkn923.
